# Supplementary material for: Multisensory spatial perception in visually impaired infants
Source: PubMed Central journal article supplement (PMC8612739; doi:10.1016/j.cub.2021.09.011), 2021-11-22
Supplement: mmc1.pdf [file mmc1.pdf]

**Current Biology, Volume 31**

**Supplemental Information**

**Multisensory spatial perception  
in visually impaired infants**

**Monica Gori, Claudio Campus, Sabrina Signorini, Eleonora Rivara, and Andrew J. Bremner**

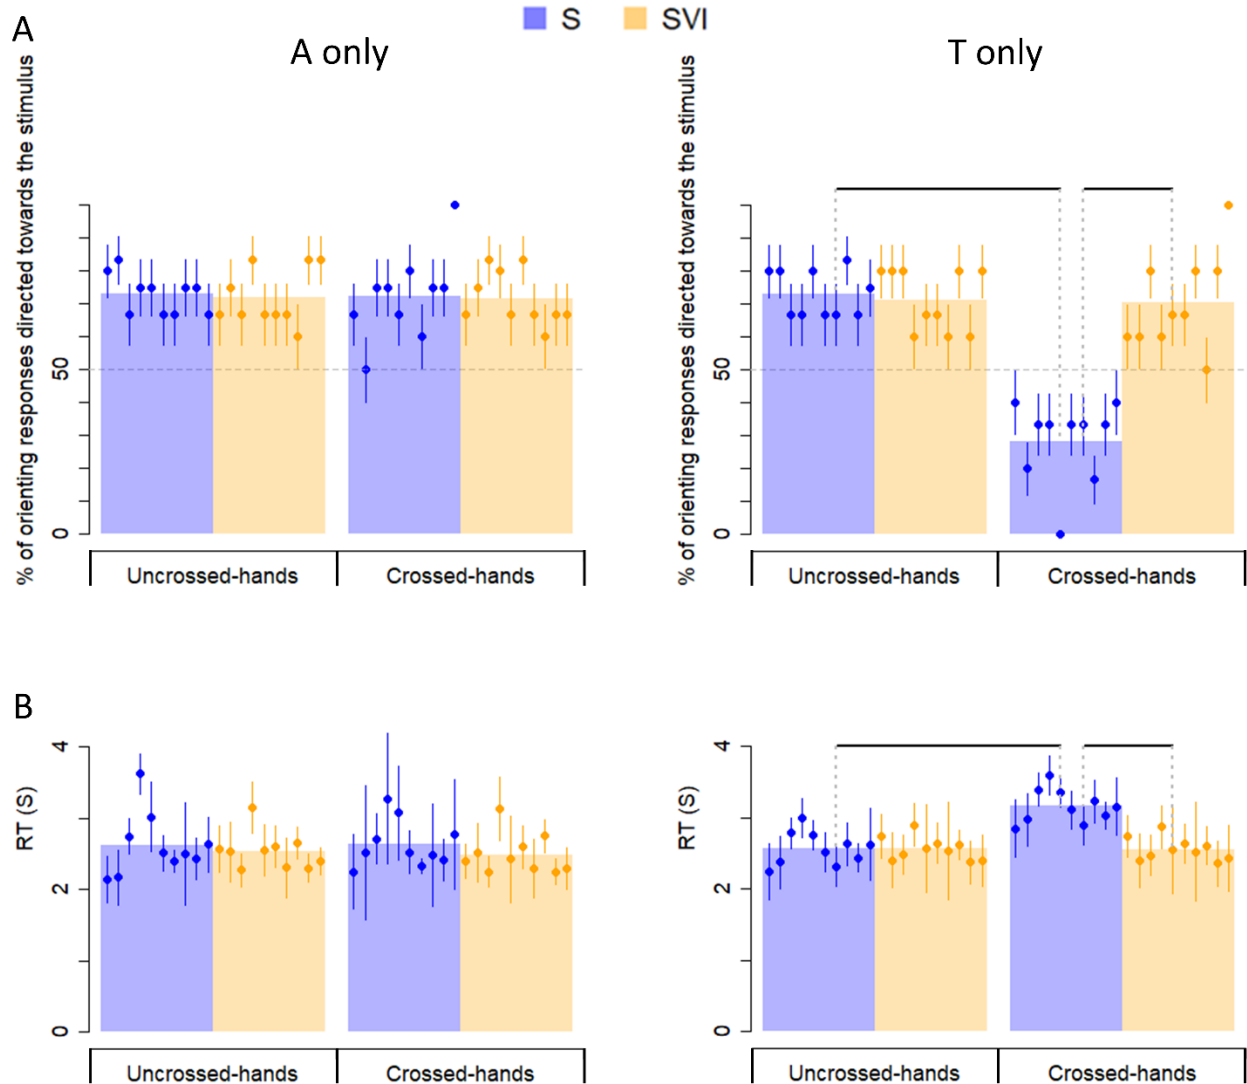

**Figure S1. Auditory and tactile localisation. Related to Figure 2 and Table 1.** The Auditory only (left) and the Tactile only (right) conditions were considered separately. (A) The percentages of infants' head and manual orienting responses were made towards the stimulated hand across stimulus conditions, posture conditions and groups (S = Sighted infants; SVI = Infants with Severe Visual Impairment). (B) The RTs of responses to the stimulated hand. Small circles and vertical lines represent single subject means and 95% confidence intervals i.e.,  $\pm 1.96$  SE. Single subject data points are ordered left to right with increasing age in months. Transparent bars represent the group means. Black horizontal lines represent significant post hoc comparisons ( $p < .05$ ) following significant 2 way interactions.

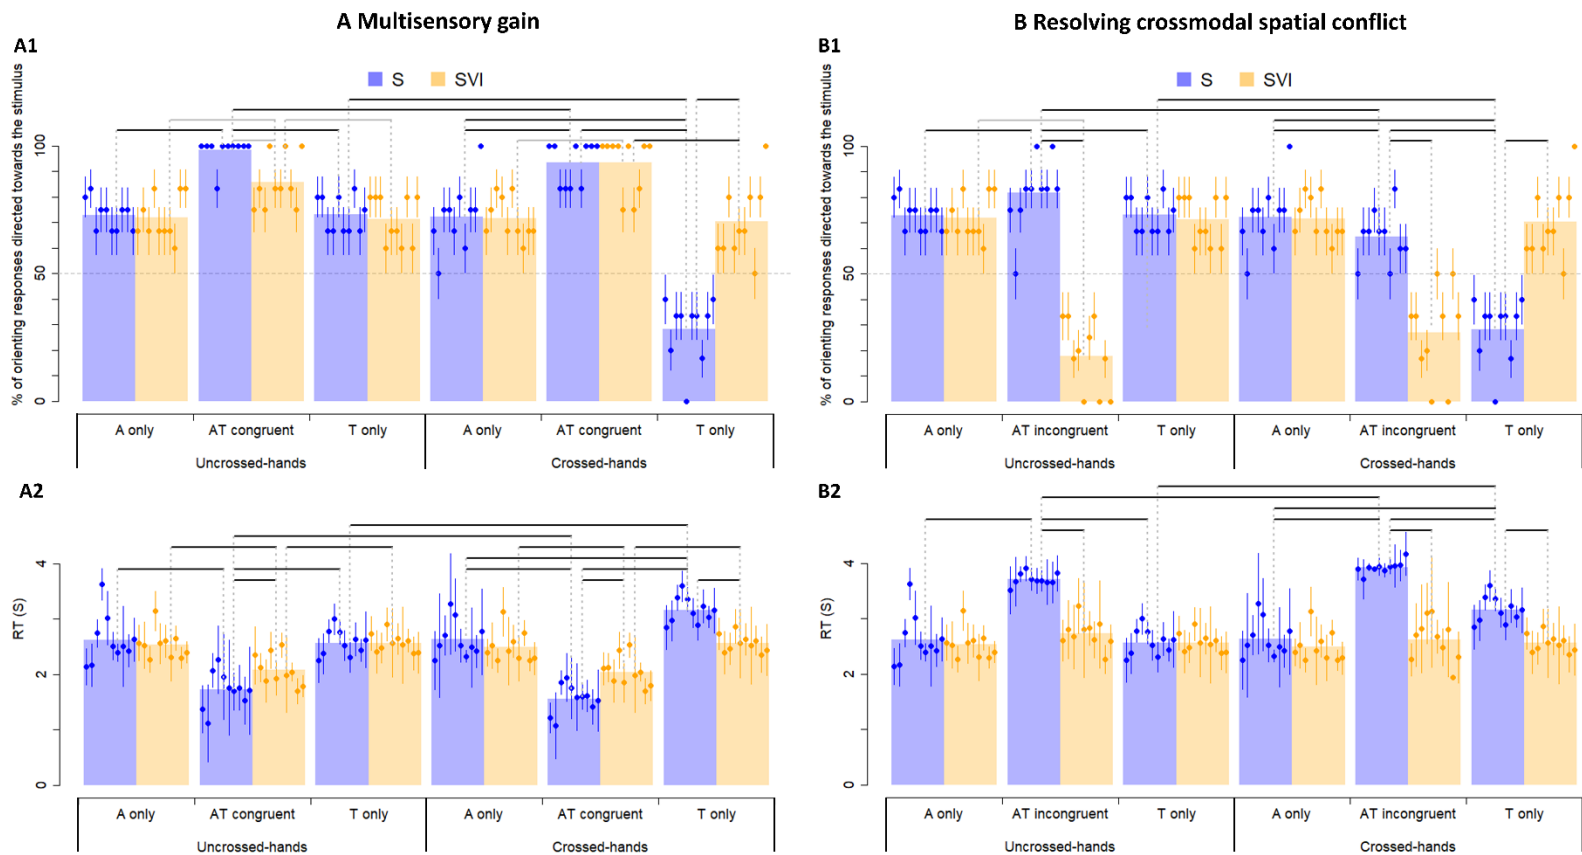

**Figure S2. Audiotactile spatial integration and interference. Related to Figure 2 and Table 1.** Investigations of multisensory integration (A) and crossmodal conflict (B) via comparisons of infants' head and manual orienting responses made towards the stimulated hand (A1 and B1) and orienting response reaction times (A2 and B2) across stimulus conditions, postures and groups (S = Sighted infants; SVI = Infants with Severe Visual Impairment). In the audiotactile incongruent condition, the data is plotted as the percentage of orienting responses directed to the auditory stimulus. Therefore, the percentage of orienting responses directed to the tactile stimulus is 100 minus the percentage values displayed in this condition. Small circles and vertical lines represent single subject means and 95% confidence intervals i.e.,  $\pm 1.96$  SE. Single subject data points are ordered left to right with increasing age in months. Transparent bars represent the group means. Post hoc comparisons performed to explore the 3 way interactions are shown by black horizontal lines for significant comparisons ( $p < .05$ ) while grey horizontal lines signal trends ( $p < .09$ ).

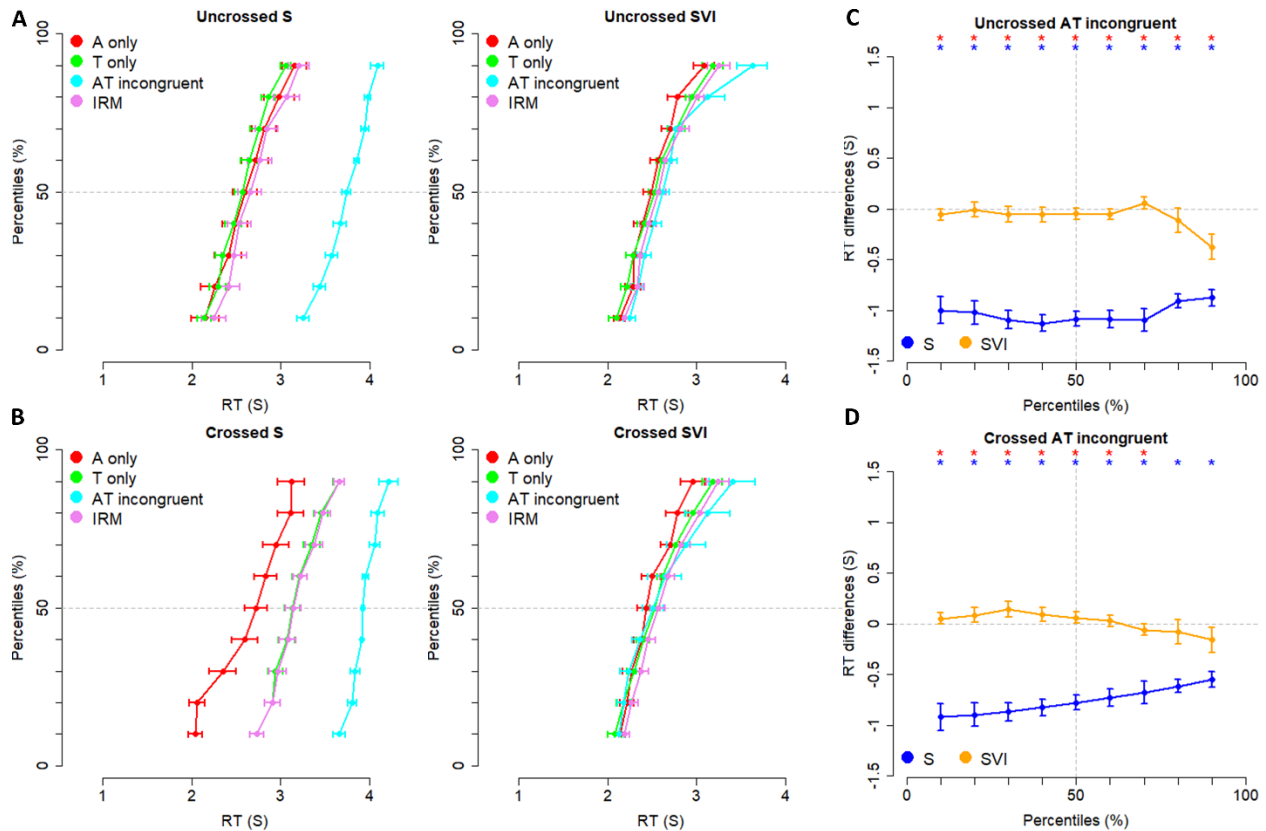

**Figure S3. Comparisons of multisensory interference effects in Severely Visually Impaired (SVI) and Sighted (S) infants via comparisons of the extent of “inverted” redundancy gains. Related to Figure 3.** An inverted race model is considered, testing reaction times in incongruent trials against the maximum of unimodal reaction times. This analysis tests if the presentation of spatially conflicting auditory and tactile cues slowed responses down significantly compared to the slowest motor reaction times in the summed cumulative distribution functions (CDFs) of the two unisensory conditions. A and B. For each posture (A: Uncrossed; B: Crossed), CDFs are presented for responses to Auditory only (red), Tactile only (green), Audiotactile incongruent (cyan) stimuli, and inverted RM prediction (IRM). C and D. Tests of inverse redundancy gains, for each Posture (C: Uncrossed; D: Crossed), Group (blue: S; orange: SVI), and percentile (10%-90%). Blue and yellow asterisks indicate inverse redundancy gains in the S and SVI infants, respectively ( $p < .05$  after Bonferroni correction for  $n = 9$  comparisons). Red asterisks indicate significant differences in inverse redundancy gains between S and SVI infants ( $p < .05$  after Bonferroni correction for  $n = 9$  comparisons). This analysis indicates that the sighted infants’ RTs were slowed more in the audiotactile incongruent condition than could be expected by the slowest (longest) reaction times in the unisensory conditions. There was a significantly greater inverse redundancy gain in the sighted compared to the SVI group.

|                                                                  | <b>Trial no.</b> | <b>Stimulus condition</b> | <b>Left hand</b> | <b>Right hand</b> |
|------------------------------------------------------------------|------------------|---------------------------|------------------|-------------------|
| <b>Blocks 1, 2 (Uncrossed-hands), &amp; 4, 5 (Crossed-hands)</b> | 1                | AT congruent              | AT               |                   |
|                                                                  | 2                | AT congruent              |                  | AT                |
|                                                                  | 3                | AT incongruent            | A                | T                 |
|                                                                  | 4                | AT congruent              | AT               |                   |
|                                                                  | 5                | A only                    |                  | A                 |
|                                                                  | 6                | AT incongruent            | T                | A                 |
|                                                                  | 7                | AT incongruent            | A                | T                 |
|                                                                  | 8                | A only                    |                  | A                 |
|                                                                  | 9                | A only                    | A                |                   |
| <b>Blocks 3 (Uncrossed-hands) &amp; 6 (Crossed-hands)</b>        | 1                | T only                    | T                |                   |
|                                                                  | 2                | T only                    |                  | T                 |
|                                                                  | 3                | T only                    | T                |                   |
|                                                                  | 4                | T only                    | T                |                   |
|                                                                  | 5                | T only                    |                  | T                 |
|                                                                  | 6                | T only                    | T                |                   |

**Table S1. Detailed order of trials presented to each infant participant. Related to Figure 1.** There were 6 blocks of trials, with blocks 4, 5, and 6 a repetition of blocks 1, 2, and 3, but in a crossed hands posture. Stimulus conditions were: i) Auditory only trials (“A only”), where a single auditory stimulus was presented to either the left or the right hand, ii) Congruent audiotactile trials (“AT congruent”), where auditory and tactile stimuli were presented to a single hand simultaneously, iii) Incongruent Audiotactile trials (“AT incongruent”), where auditory and tactile stimuli were presented across separate hands simultaneously, and iv) Tactile only trials (“T only”), where a single tactile stimulus was presented to either the left or the right hand. The presentation of stimuli in left and right hands are detailed in the last two columns (A = Auditory stimulus, T = Tactile stimulus, AT = Audiotactile stimulus).

| Group                                   | Age (m) | Gender | Neuro-ophthalmological pathology                                                                    | Grating acuity                                                | Class of impairment |
|-----------------------------------------|---------|--------|-----------------------------------------------------------------------------------------------------|---------------------------------------------------------------|---------------------|
| <b>Severely visually impaired (SVI)</b> | 5       | Male   | Nystagmus and roving eye movements                                                                  | 1.7 cy/deg                                                    | SVI                 |
|                                         | 6       | Male   | Inherited retinal dystrophy (Leber's Congenital Amaurosis)                                          | Sporadic light perception at very close distance              | CB (complete)       |
|                                         | 15      | Female | Microphthalmia in left eye with bilateral ocular coloboma and cataract                              | 2.40 cy/deg (light perception only in left eye)               | SVI                 |
|                                         | 17      | Female | Oculocutaneous albinism                                                                             | 4.7 cy/deg                                                    | MVI/SVI             |
|                                         | 20      | Male   | Microphthalmia in right eye with bilateral large chorioretinal and iris coloboma                    | 2.20 cy/deg                                                   | SVI                 |
|                                         | 27      | Male   | Bilateral optic nerve hypoplasia                                                                    | Sporadic light perception at very close distance              | CB (complete)       |
|                                         | 28      | Male   | Bilateral optic nerve hypoplasia                                                                    | 1.3 cy/deg                                                    | SVI                 |
|                                         | 29      | Female | Retinal detachment in bilateral stage 5 retinopathy of prematurity (ocular prosthesis in right eye) | Sporadic Low Vision; Teller Card perception at close distance | CB (Partial)        |
|                                         | 32      | Male   | Inherited retinal dystrophy                                                                         | 4.7 cy/deg                                                    | MVI/SVI             |
|                                         | 35      | Female | Inherited retinal dystrophy (achromatopsia)                                                         | 2.4 cy/deg                                                    | SVI                 |
| <b>Sighted (S)</b>                      | 8       | Male   | -                                                                                                   | -                                                             | -                   |
|                                         | 20      | Male   | -                                                                                                   | -                                                             | -                   |
|                                         | 21      | Female | -                                                                                                   | -                                                             | -                   |
|                                         | 25      | Male   | -                                                                                                   | -                                                             | -                   |
|                                         | 27      | Female | -                                                                                                   | -                                                             | -                   |
|                                         | 27      | Male   | -                                                                                                   | -                                                             | -                   |
|                                         | 27      | Female | -                                                                                                   | -                                                             | -                   |
|                                         | 27      | Female | -                                                                                                   | -                                                             | -                   |
|                                         | 28      | Female | -                                                                                                   | -                                                             | -                   |
|                                         | 31      | Male   | -                                                                                                   | -                                                             | -                   |

**Table S2. Details of the participants including clinical details of the visually impaired participants. Related to Figure 2.** Participants' genders and age in months are presented. The data points in Figures. 2, S1 and S2 are presented in order of age in months. In the severely visually impaired (SVI) group neuro-ophthalmological pathologies, grating acuities (assessed via Teller acuity cards where possible) and class of impairment are reported (CB = Congenitally blind; MVI = Moderate visual impairment; SVI = Severe Visual Impairment).

| Group                            | Stimulus condition | Posture         | Total completed trials | Disagreement |          | Null |      | Analyzed |      |            | RT > 4 s |
|----------------------------------|--------------------|-----------------|------------------------|--------------|----------|------|------|----------|------|------------|----------|
|                                  |                    |                 |                        | Side         | Modality | Both | None | Eye      | Hand | Eye & hand |          |
| Sighted (S)                      | A only             | Uncrossed-hands | 60                     | 2            | 1        | 1    | 5    | 10       | 38   | 3          | 0        |
|                                  |                    | Crossed-hands   | 48                     | 3            | 2        | 1    | 5    | 11       | 22   | 4          | 0        |
|                                  | AT congruent       | Uncrossed-hands | 60                     | 0            | 0        | 1    | 1    | 7        | 44   | 7          | 0        |
|                                  |                    | Crossed-hands   | 57                     | 0            | 0        | 0    | 2    | 10       | 38   | 7          | 0        |
|                                  | AT incongruent     | Uncrossed-hands | 60                     | 1            | 0        | 3    | 3    | 15       | 32   | 6          | 6        |
|                                  |                    | Crossed-hands   | 50                     | 1            | 0        | 1    | 2    | 17       | 25   | 4          | 11       |
|                                  | T only             | Uncrossed-hands | 60                     | 1            | 0        | 2    | 2    | 14       | 35   | 6          | 0        |
|                                  |                    | Crossed-hands   | 60                     | 0            | 0        | 1    | 3    | 10       | 42   | 4          | 0        |
| Severely Visually Impaired (SVI) | A only             | Uncrossed-hands | 60                     | 1            | 0        | 1    | 1    | 10       | 41   | 6          | 0        |
|                                  |                    | Crossed-hands   | 47                     | 0            | 1        | 1    | 1    | 12       | 27   | 5          | 0        |
|                                  | AT congruent       | Uncrossed-hands | 60                     | 0            | 0        | 8    | 4    | 13       | 30   | 5          | 0        |
|                                  |                    | Crossed-hands   | 53                     | 0            | 0        | 3    | 6    | 8        | 33   | 3          | 0        |
|                                  | AT incongruent     | Uncrossed-hands | 60                     | 1            | 0        | 3    | 3    | 10       | 40   | 3          | 5        |
|                                  |                    | Crossed-hands   | 49                     | 3            | 0        | 3    | 2    | 9        | 28   | 4          | 6        |
|                                  | T only             | Uncrossed-hands | 60                     | 0            | 0        | 2    | 6    | 6        | 41   | 5          | 0        |
|                                  |                    | Crossed-hands   | 60                     | 0            | 2        | 6    | 2    | 10       | 38   | 2          | 0        |

**Table S3. Details of trials completed and trials submitted to analyses across groups and conditions. Related to Figure 2.** For each group, condition and posture, this table reports the number of: total completed trials; trials in which there was an inter-rater disagreement about side or modality (these were not included in analyses); trials which were coded as a null response due to a movement of both hands or an absence of motion within 8 seconds (these were not included in analyses; a marginally significant effect of group on the numbers of null trials was recorded,  $t(156.6) = 1.973$ ,  $p = .05$ .); trials submitted to analysis, i.e. trials in which an orienting response was agreed between coders, subdivided across orienting responses of the eye (or head), of the hand, or both; trials where the response was made at a latency > 4 seconds (these were included in the analyses reported in the paper, but we determined that their exclusion did not modify the pattern of findings)

| Contrast list 1        | Group   | Orienting Direction (GLMM) |        |       | Reaction Time (LMM) |        |       |
|------------------------|---------|----------------------------|--------|-------|---------------------|--------|-------|
|                        |         | z                          | p      | d     | z                   | p      | d     |
| Uncrossed -<br>Crossed | Sighted | 3.712                      | <.001* | 1.950 | 6.296               | <.001* | 2.882 |
|                        | SVI     | .173                       | .863   | .093  | .606                | .553   | .273  |

  

| Contrast list 2  | Posture   | Orienting Direction (GLMM) |        |        | Reaction Time (LMM) |        |        |
|------------------|-----------|----------------------------|--------|--------|---------------------|--------|--------|
|                  |           | z                          | p      | d      | z                   | p      | d      |
| Sighted –<br>SVI | Uncrossed | -.145                      | .885   | -.078  | .096                | .924   | .044   |
|                  | Crossed   | -.665                      | <.001* | -1.935 | -5.643              | <.001* | -2.565 |

**Table S4. Results of the contrasts investigating tactile localization and body representation analyses for both generalised linear mixed models (GLMMs) applied to the direction of infants orienting responses (Left columns) and linear mixed models (LMMs) applied to reaction times (RTs; Right columns). Related to Figure 2.** For the 2 way interaction of Group x Posture, the Bonferroni correction was applied considering contrasts of interest, i.e., for each level of one factor, the pairwise comparisons were made between all levels of the other factor. For each group (S/SVI) we compared postures (contrast list 1, in emmeans: list(pairwise~posture|group), n = 2 comparisons); for each posture we compared groups (contrast list 2, in emmeans: list(pairwise~group|posture), n = 2 comparisons). \* = significant comparisons.



**MULTISENSORY INTEGRATION MODELS**

| Contrast list 1     | Group   | Condition | Orienting Direction (GLMM) |        |       | Reaction Time (LMM) |        |        |
|---------------------|---------|-----------|----------------------------|--------|-------|---------------------|--------|--------|
|                     |         |           | z                          | p      | d     | z                   | p      | d      |
| Uncrossed - Crossed | Sighted | Auditory  | .156                       | .876   | .078  | -.448               | .656   | -.205  |
|                     | Blind   | Auditory  | -.026                      | .979   | -.012 | .678                | .500   | .306   |
|                     | Sighted | Congruent | 1.237                      | .216   | 1.519 | 2.688               | .009*  | 1.230  |
|                     | Blind   | Congruent | -1.074                     | .283   | -.823 | .424                | .672   | .192   |
|                     | Sighted | Tactile   | 4.358                      | <.001* | 1.900 | -9.828              | <.001* | -4.498 |
|                     | Blind   | Tactile   | -.088                      | .930   | -.040 | .095                | .925   | .043   |

| Contrast list 2             | Condition | Posture   | Orienting Direction (GLMM) |        |        | Reaction Time (LMM) |        |        |
|-----------------------------|-----------|-----------|----------------------------|--------|--------|---------------------|--------|--------|
|                             |           |           | z                          | p      | d      | z                   | p      | d      |
| Sighted – Visually impaired | Auditory  | Uncrossed | .137                       | .891   | .061   | .472                | .641   | .453   |
|                             | Congruent | Uncrossed | 1.934                      | .053+  | 2.272  | -2.877              | .008*  | -2.765 |
|                             | Tactile   | Uncrossed | .274                       | .784   | .121   | -.079               | .938   | -.076  |
|                             | Auditory  | Crossed   | -.057                      | .954   | -.029  | 1.003               | .326   | .964   |
|                             | Congruent | Crossed   | -.083                      | .934   | -.070  | -3.958              | .001*  | -3.804 |
|                             | Tactile   | Crossed   | -4.096                     | <.001* | -1.819 | 4.647               | <.001* | 4.465  |

| Contrast list 3      | Posture   | Group   | Orienting Direction (GLMM) |        |        | Reaction Time (LMM) |        |         |
|----------------------|-----------|---------|----------------------------|--------|--------|---------------------|--------|---------|
|                      |           |         | z                          | p      | d      | z                   | p      | d       |
| Auditory - Congruent | Uncrossed | Sighted | -2.707                     | .020*  | -3.087 | 14.726              | <.001* | 6.741   |
| Auditory - Tactile   | Uncrossed | Sighted | .016                       | 1.000  | .007   | .594                | 1.000  | .272    |
| Congruent - Tactile  | Uncrossed | Sighted | 2.722                      | .019*  | 3.094  | -14.132             | <.001* | -6.469  |
| Auditory - Congruent | Crossed   | Sighted | -2.422                     | .046*  | -1.645 | 17.861              | <.001* | 8.176   |
| Auditory - Tactile   | Crossed   | Sighted | 3.767                      | <.001* | 1.829  | -8.786              | <.001* | -4.022  |
| Congruent - Tactile  | Crossed   | Sighted | 5.442                      | <.001* | 3.474  | -26.647             | <.001* | -12.197 |
| Auditory - Congruent | Uncrossed | Blind   | -2.667                     | .052+  | -1.895 | 7.806               | <.001* | 3.523   |

|                      |           |       |        |       |        |        |        |        |
|----------------------|-----------|-------|--------|-------|--------|--------|--------|--------|
| Auditory - Tactile   | Uncrossed | Blind | .157   | 1.000 | .067   | -.570  | 1.000  | -.257  |
| Congruent - Tactile  | Uncrossed | Blind | 2.756  | .054+ | 1.753  | -8.375 | <.001* | -3.780 |
| Auditory - Congruent | Crossed   | Blind | -2.350 | .056+ | -1.687 | 7.552  | <.001* | 3.408  |
| Auditory - Tactile   | Crossed   | Blind | .083   | 1.000 | .039   | -1.153 | .758   | -.520  |
| Congruent - Tactile  | Crossed   | Blind | 2.427  | .046* | 1.726  | -8.705 | <.001* | -3.928 |

---

### CROSSMODAL CONFLICT MODELS

| Contrast list 1     | Group   | Condition   | Orienting Direction (GLMM) |        |        | Reaction Time (LMM) |        |        |
|---------------------|---------|-------------|----------------------------|--------|--------|---------------------|--------|--------|
|                     |         |             | z                          | p      | d      | z                   | p      | d      |
| Uncrossed - Crossed | Sighted | Auditory    | -.270                      | .787   | -.059  | -.355               | .723   | -.163  |
|                     | Blind   | Auditory    | .442                       | .658   | .089   | .538                | .592   | .243   |
|                     | Sighted | Incongruent | -2.626                     | .009*  | -.530  | -2.867              | .005*  | -1.312 |
|                     | Blind   | Incongruent | .837                       | .403   | .175   | 1.533               | .129   | .692   |
|                     | Sighted | Tactile     | -7.286                     | <.001* | -1.383 | -7.796              | <.001* | -3.568 |
|                     | Blind   | Tactile     | .070                       | .944   | .014   | .075                | .940   | .034   |

| Contrast list 2             | Condition   | Posture   | Orienting Direction (GLMM) |        |       | Reaction Time (LMM) |        |       |
|-----------------------------|-------------|-----------|----------------------------|--------|-------|---------------------|--------|-------|
|                             |             |           | z                          | p      | d     | z                   | p      | d     |
| Sighted – Visually impaired | Auditory    | Uncrossed | .512                       | .611   | .146  | .496                | .623   | .360  |
|                             | Incongruent | Uncrossed | 7.999                      | <.001* | 2.291 | 8.113               | <.001* | 5.882 |
|                             | Tactile     | Uncrossed | .035                       | .972   | .010  | -.083               | .934   | -.060 |
|                             | Auditory    | Crossed   | .956                       | .343   | .294  | 1.055               | .299   | .765  |
|                             | Incongruent | Crossed   | 9.932                      | <.001* | 2.996 | 1.877               | <.001* | 7.886 |
|                             | Tactile     | Crossed   | 4.912                      | <.001* | 1.407 | 4.886               | <.001* | 3.542 |

| Contrast list 3        | Posture   | Group   | Orienting Direction (GLMM) |        |        | Reaction Time (LMM) |        |        |
|------------------------|-----------|---------|----------------------------|--------|--------|---------------------|--------|--------|
|                        |           |         | z                          | p      | d      | z                   | p      | d      |
| Auditory - Incongruent | Uncrossed | Sighted | -13.200                    | <.001* | -2.598 | -14.666             | <.001* | -6.713 |

|                        |           |         |         |        |        |         |        |        |
|------------------------|-----------|---------|---------|--------|--------|---------|--------|--------|
| Auditory - Tactile     | Uncrossed | Sighted | .306    | 1.000  | .060   | .472    | 1.000  | .216   |
| Incongruent - Tactile  | Uncrossed | Sighted | 13.783  | <.001* | 2.658  | 15.138  | <.001* | 6.929  |
| Auditory - Incongruent | Crossed   | Sighted | -13.864 | <.001* | -3.069 | -17.178 | <.001* | -7.863 |
| Auditory - Tactile     | Crossed   | Sighted | -5.965  | <.001* | -1.265 | -6.969  | <.001* | -3.190 |
| Incongruent - Tactile  | Crossed   | Sighted | 9.035   | <.001* | 1.804  | 1.209   | <.001* | 4.673  |
| Auditory - Incongruent | Uncrossed | Blind   | -2.369  | .054+  | -.453  | -1.638  | .275   | -.691  |
| Auditory - Tactile     | Uncrossed | Blind   | -.398   | 1.000  | -.076  | -.452   | 1.000  | -.204  |
| Incongruent - Tactile  | Uncrossed | Blind   | 1.925   | .164   | .377   | 1.687   | .291   | .687   |
| Auditory - Incongruent | Crossed   | Blind   | -1.688  | .276   | -.367  | -1.644  | .313   | -.742  |
| Auditory - Tactile     | Crossed   | Blind   | -.731   | 1.000  | -.152  | -.914   | 1.000  | -.413  |
| Incongruent - Tactile  | Crossed   | Blind   | 1.017   | .928   | .216   | .729    | 1.000  | .329   |

**Table S5. Results of the contrasts carried out for multisensory integration analyses (top), and crossmodal conflict analyses (bottom) for both generalised linear mixed models (GLMMs) applied to the direction of infants orienting responses (Left columns) and linear mixed models (LMMs) applied to reaction times (RTs; Right columns). Related to Figure 2.** For the 3 way interaction of Group x Posture x Condition, the Bonferroni correction was applied considering contrasts of interest, i.e., for each level of two factors, pairwise comparisons were made between all levels of the third. For each group and condition we compared postures (contrast lists 1, in emmeans: list(pairwise~posture|group\*condition), n = 6 comparisons); for each condition and posture we compared groups (contrast lists 2, in emmeans: list(pairwise~group|condition\*posture), n = 6 comparisons); for each posture and group we compared conditions (contrast lists 3, in emmeans: list(pairwise~condition|posture\*group), n = 12 comparisons). \* = significant comparisons (p<.05), while + = trends (p<.09).
